# Supplementary material for: The Far-INfrarEd Spectrometer for Surface Emissivity (FINESSE) Part II: First measurements of the emissivity of water in the far-infrared
Source: Copernicus journal article supplement (doi:10.5194/amt-2024-21), 2024-04-29
Supplement: Supplementary file [file amt-2024-21-AC1-supplement.pdf]

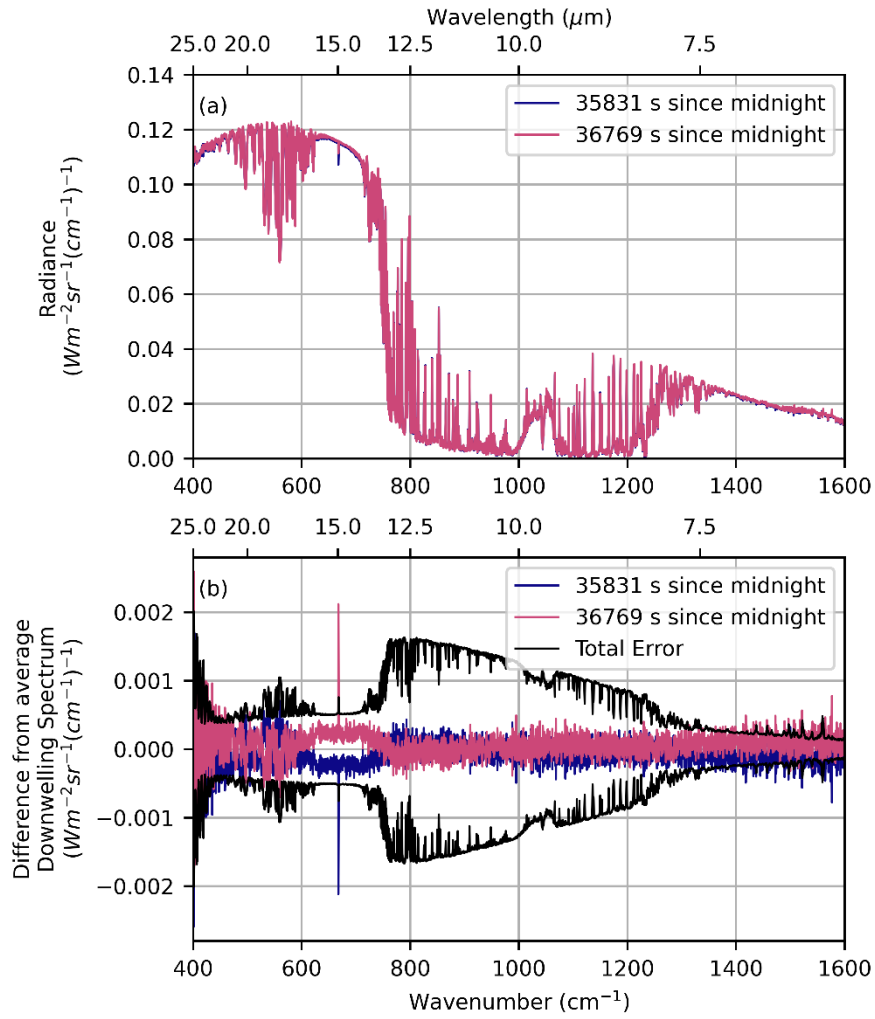

Figure A. (a) the downwelling radiance measurements made during two consecutive measurement cycles on 11<sup>th</sup> February. (b) the difference between these spectra and their average showing that the difference is smaller than the total measurement error.
